# Supplementary material for: Cysteine synthase: multiple structures of a key enzyme in cysteine synthesis and a potential drug target for Chagas disease and leishmaniasis
Source: PubMed Central journal article supplement (PMC10233618; doi:10.1107/s2059798323003613), 2023-05-19
Supplement: d-79-00518-sup1.pdf [file d-79-00518-sup1.pdf]

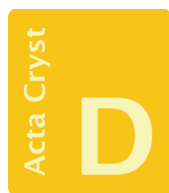

STRUCTURAL  
BIOLOGY

**Volume 79 (2023)**

**Supporting information for article:**

**Cysteine synthase: multiple structures of a key enzyme in cysteine synthesis and a potential drug target for Chagas disease and leishmaniasis**

**Kate Sowerby, Stefanie Freitag-Pohl, Ana Milena Murillo, Ariel Mariano Silber and Ehmke Pohl**

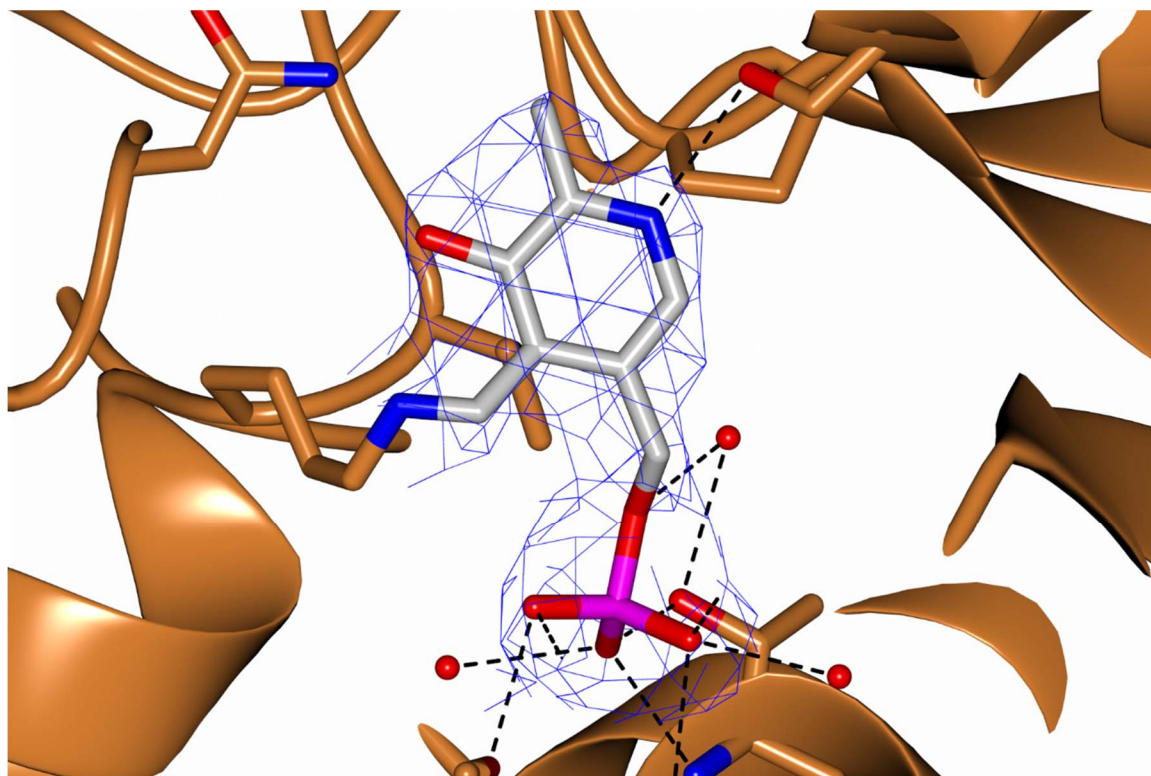

**Figure S1** Closeup of the active site of *ThCS*, showing the protein chain in ribbon representation, the cofactor PLP and the side chains of Lys<sup>71</sup>, Thr<sup>207</sup>, Thr<sup>210</sup> and Ser<sup>294</sup> in stick representation with N in blue, O in red, C in green and P in magenta. Key hydrogen bonds are indicated by dashed lines. Electron density is shown in blue at 1  $\sigma$  level in a  $2F_o-F_c$  map.

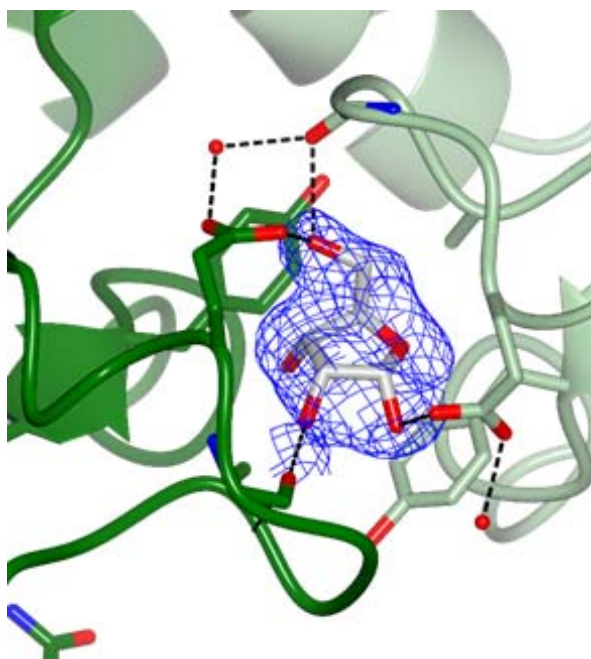

**Figure S2** Ribbon diagram of the dimer interface of chain A and B of *TcCS* – Chain A in dark green, Chain B in light green, ribose shown in stick representation. O is shown in red and N is shown in blue. Residues forming hydrogen bonds and ribose are shown in stick representation with hydrogen bonds displayed as black dashed lines. Electron density is shown in a  $2F_o - F_c$  map blue at  $1 \sigma$  level.

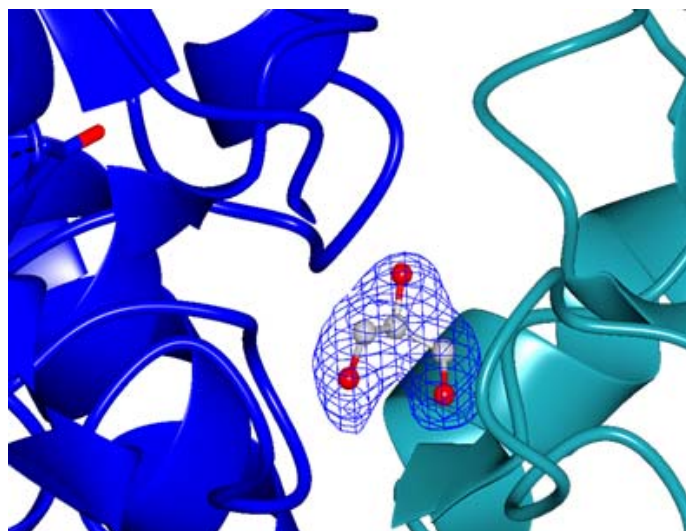

**Figure S3** Ribbon diagram of the dimer interface of chain C and D in *TcCS* - Chain C in blue chain D in dark teal, glycerol is shown in stick representation. O is shown in red. Electron density is shown in a  $2F_o-F_c$  map blue at  $1 \sigma$  level.

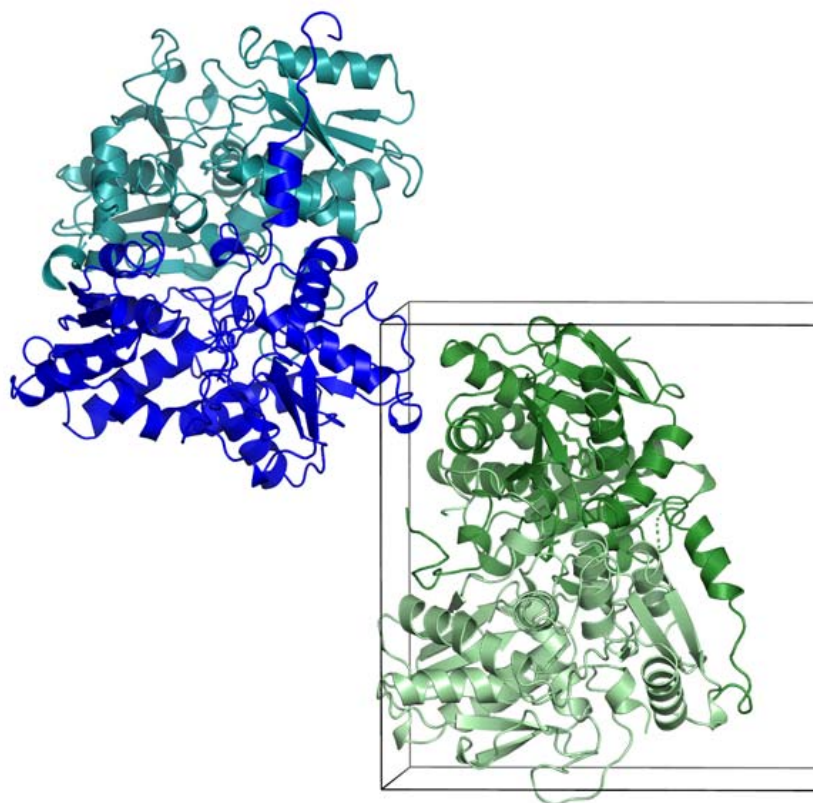

**Figure S4** Ribbon diagram of the two crystallographically independent *TcCS* dimers with the unit cell shown in black: Chain A in dark green, Chain B in light green, Chain C in blue, Chain D in dark teal.

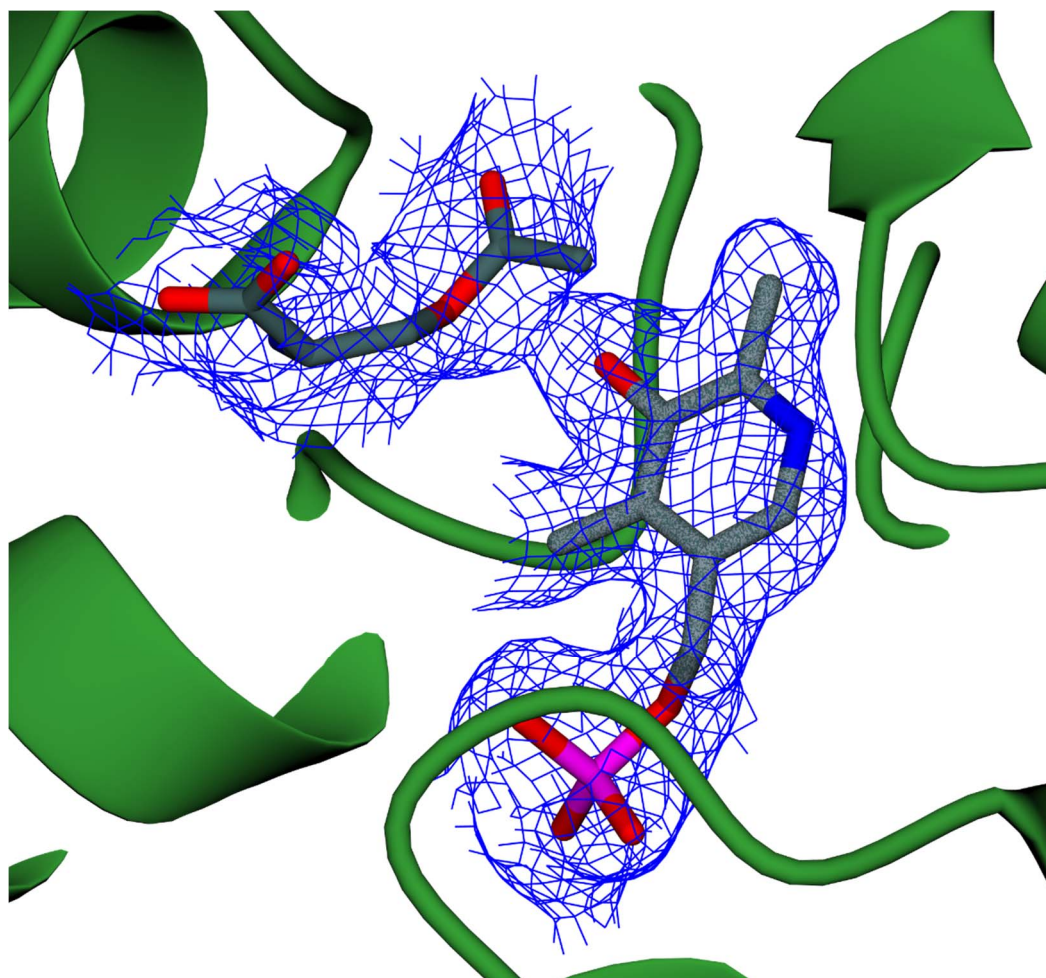

**Figure S5** Close up showing active site of *TcCS* Chain A. Dashed lines indicate hydrogen bonds. Atoms are coloured as before. Electron density is shown in a  $2F_o - F_c$  map blue at  $1\sigma$  level with the electron density indicating the presence of OAS.

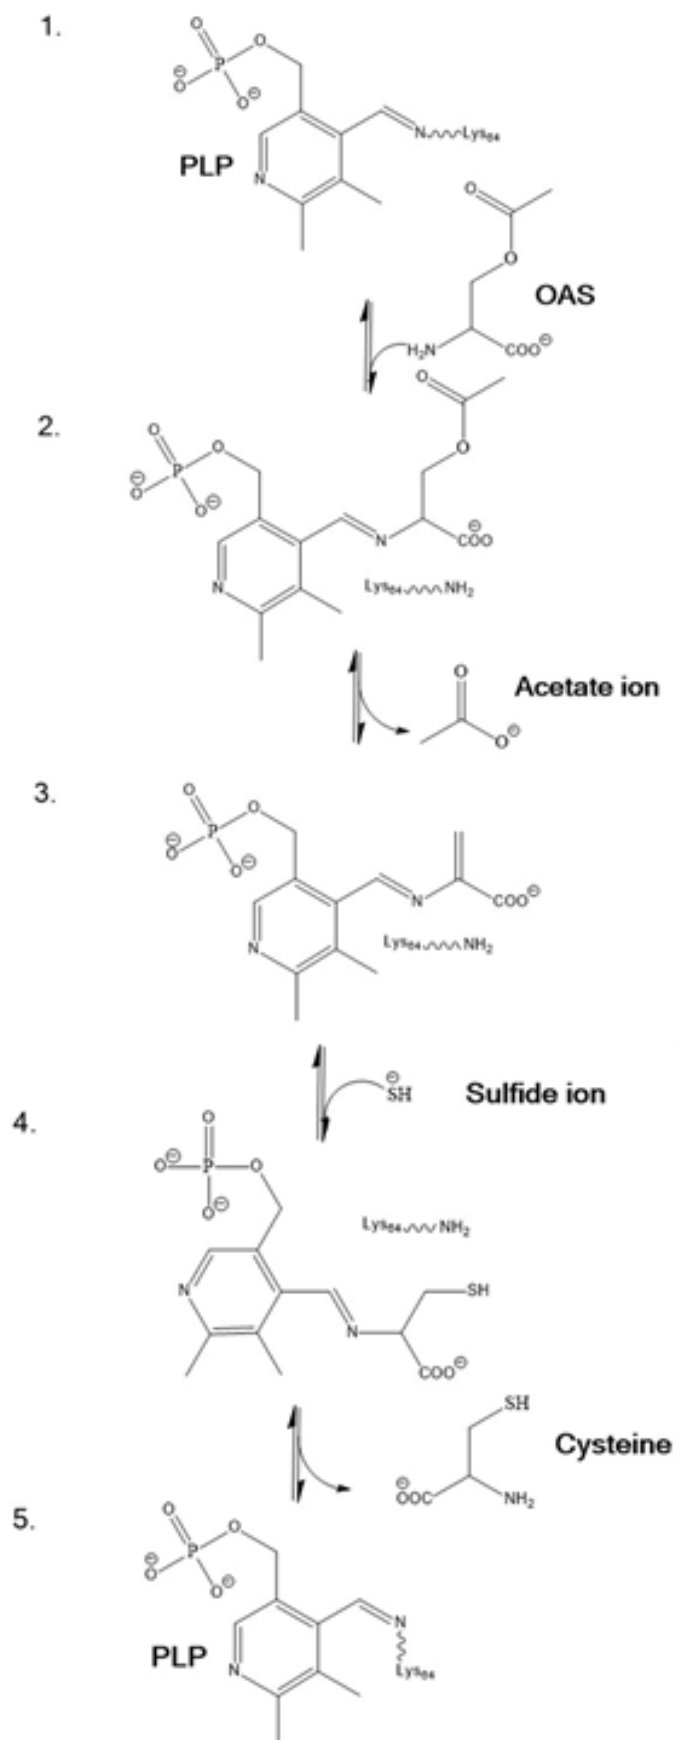

**Figure S6** Schema showing reaction of PLP with OAS and a sulfide ion to produce cysteine.

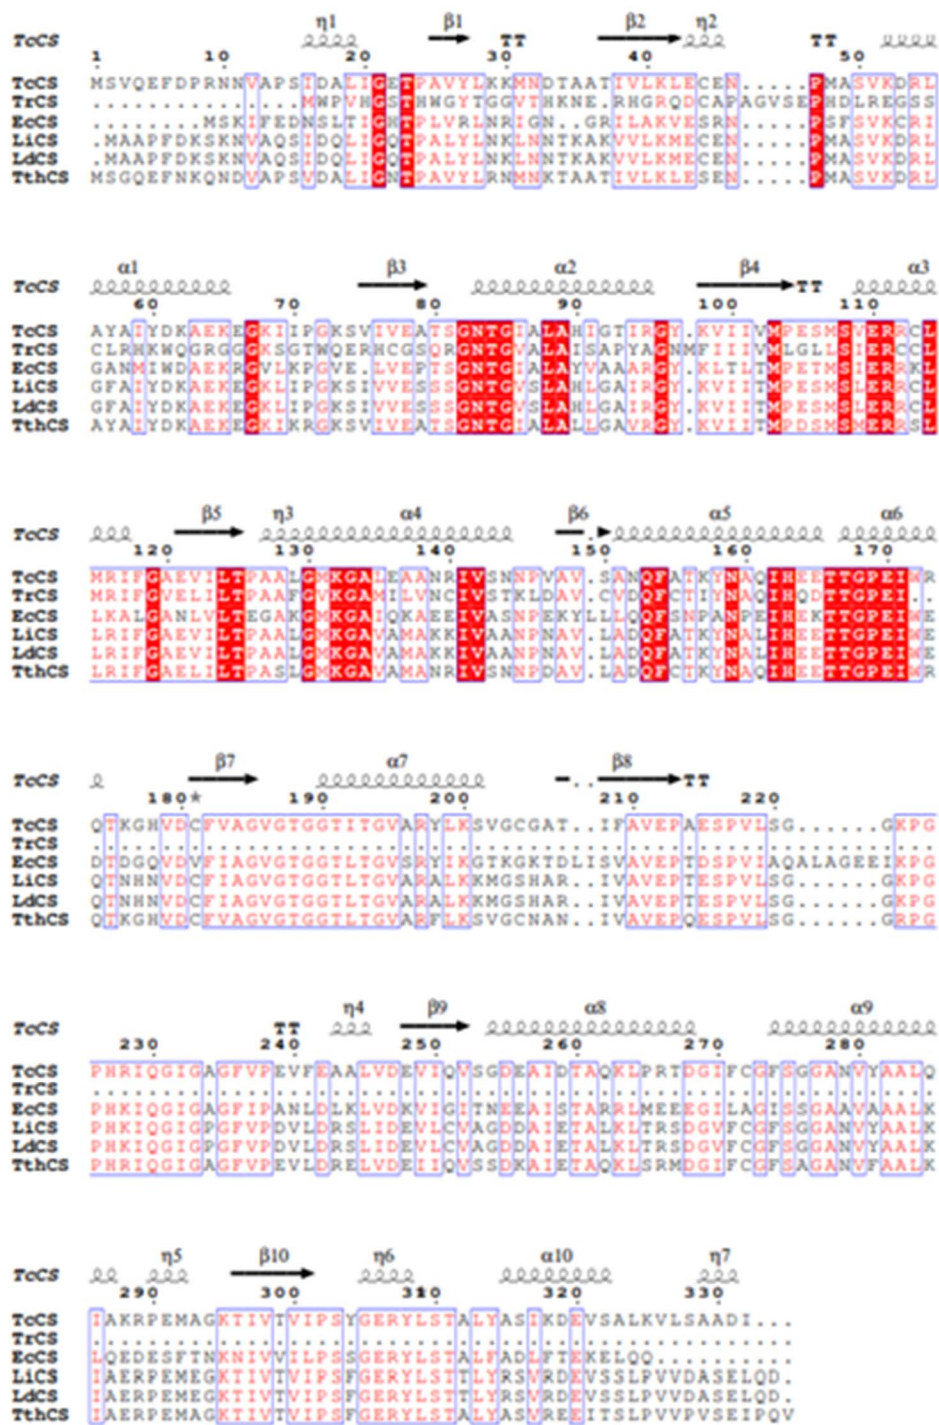

**Figure S7** Multiple Alignment of the cysteine synthase sequences of *T. cruzi*, *T. rangeli*, *E. coli*, *L. infantum*, *L. donovani* and *T. theileri*. Identical residues are displayed in a red box, with similar residues in red text, similar or identical residues are framed in a blue box. The secondary structure annotation is based on the *TcCS* structure presented here.



**Table S1** Summary of least-squares superpositions of all protein monomers of the three structures, from *TcCS*, *LiCS* and *TthCS*.

Residues 8 – 308 from *TcCS* and the corresponding residues 5 – 307 from *LiCS* and 6 – 308 from *TthCS* were used. RMSD values given in Å are presented on the upper right-hand side of table, while the lower left-hand side shows the number of C-alpha atoms used in each least-squares superposition. All calculations were performed with CCP4mg (McNicholas *et al.*, 2011)

|                | <b>TcCS A</b> | <b>TcCS B</b> | <b>TcCS C</b> | <b>TcCS D</b> | <b>LiCS A</b> | <b>LiCS B</b> | <b>TthCS A</b> | <b>TthCS B</b> |
|----------------|---------------|---------------|---------------|---------------|---------------|---------------|----------------|----------------|
| <b>TcCS A</b>  |               | 0.54          | 0.30          | 0.50          | 0.70          | 0.78          | 0.63           | 0.56           |
| <b>TcCS B</b>  | 282           |               | 0.60          | 0.17          | 0.84          | 1.02          | 0.64           | 0.71           |
| <b>TcCS C</b>  | 287           | 298           |               | 0.54          | 0.78          | 0.73          | 0.69           | 0.63           |
| <b>TcCS D</b>  | 282           | 303           | 298           |               | 0.83          | 0.94          | 0.62           | 0.68           |
| <b>LiCS A</b>  | 274           | 270           | 275           | 270           |               | 0.72          | 0.74           | 0.72           |
| <b>LiCS B</b>  | 275           | 271           | 274           | 269           | 277           |               | 1.09           | 0.97           |
| <b>TthCS A</b> | 281           | 303           | 297           | 303           | 268           | 269           |                | 0.74           |
| <b>TthCS B</b> | 281           | 303           | 297           | 303           | 269           | 270           | 268            |                |
